# Supplementary material for: The Preparation of TiO2 Film by the Sol-Gel Method and Evaluation of Its Self-Cleaning Property
Source: Materials (Basel). 2018 Mar 19;11(3):450. doi: 10.3390/ma11030450 (PMC5873029; doi:10.3390/ma11030450)
Supplement: Supplementary file 1 [file materials-11-00450-s001.pdf]

## Supplementary materials

# The Preparation of TiO<sub>2</sub> Film by the Sol-Gel Method and Evaluation of Its Self-Cleaning Property

Yu Liang <sup>1,2</sup>, Sijia Sun <sup>1</sup>, Tongrong Deng <sup>1</sup>, Hao Ding <sup>1,\*</sup>, Wanting Chen <sup>1</sup> and Ying Chen <sup>1</sup>

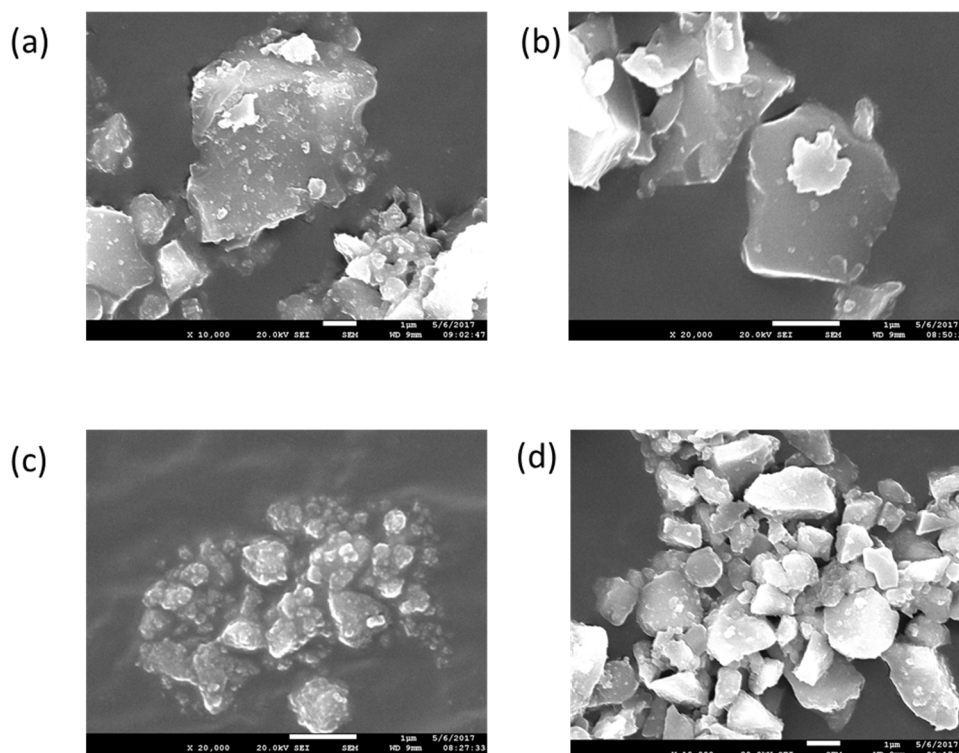

**Figure S1.** SEM images of the TiO<sub>2</sub> powders produced by using acetylacetone as hydrolysis control agent and (a) dried at 100 °C; (b) calcined at 300 °C; (c) calcined at 400 °C; (d) calcined at 600 °C.

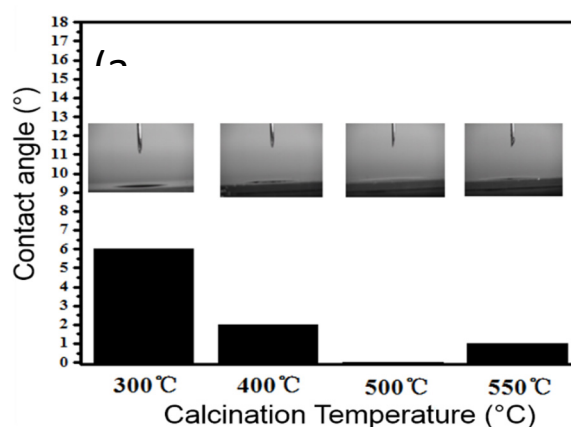

**Figure S2.** Contact angle of TiO<sub>2</sub> film by using acetylacetone as the hydrolysis control agent, calcined at different temperatures and ultraviolet irradiated for 30 min.
